# Supplementary material for: Impact of a Culturally Focused Psychiatric Consultation on Depressive Symptoms Among Latinos in Primary Care
Source: Atypon-hosted journal article supplement (doi:10.1176/appi.ps.201300088), 2014-06-02
Supplement: 1256_ds001.pdf [file 1256_ds001.pdf]

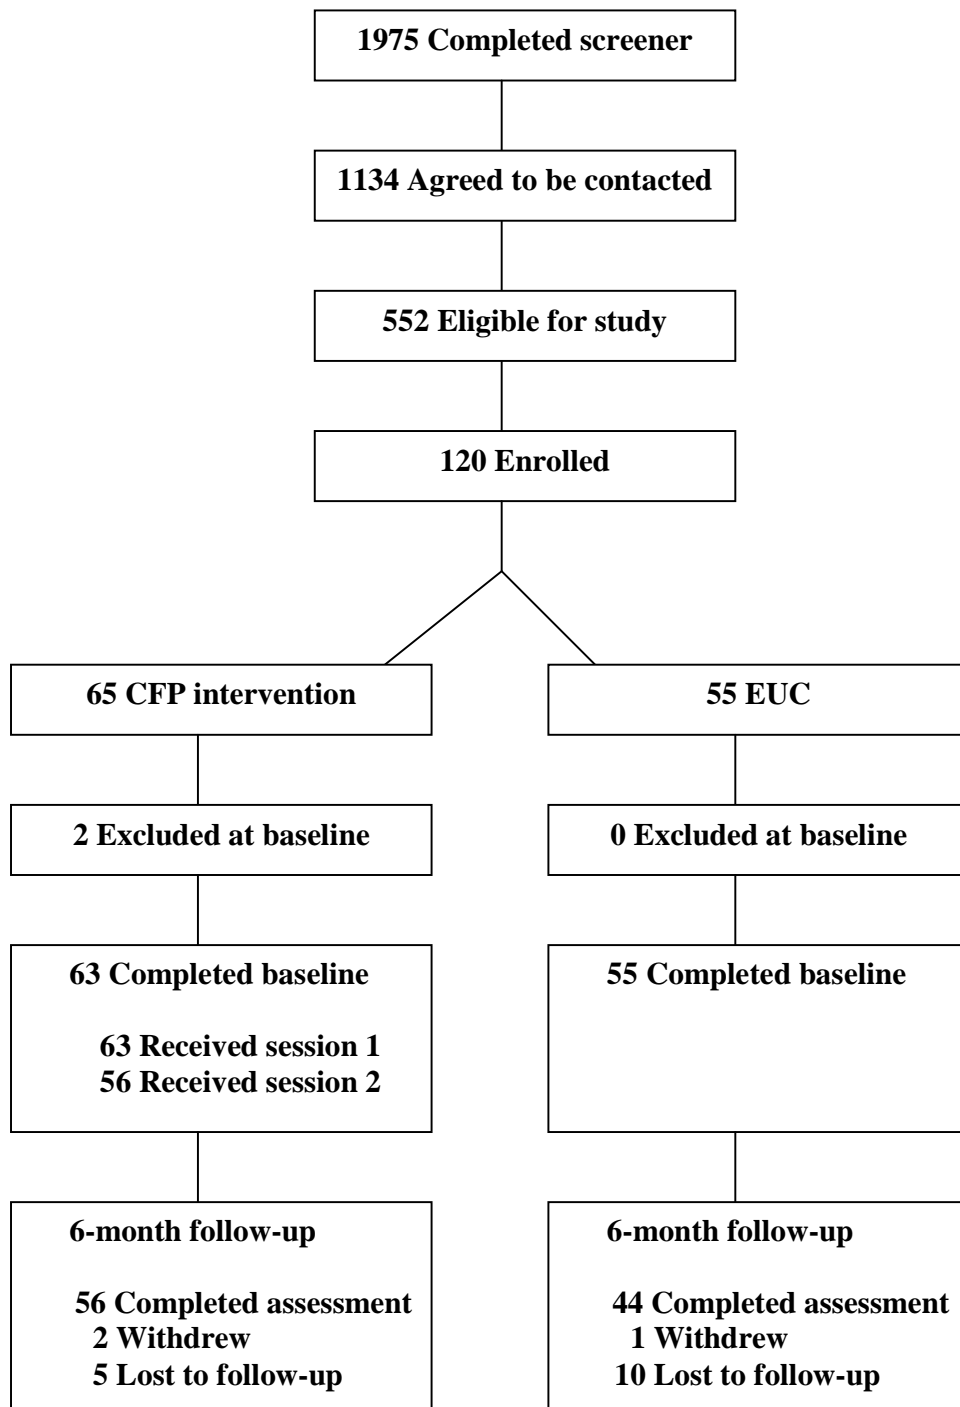

Consolidated Standards of Reporting Trials (CONSORT), flow chart of Latino participants. CFP = culturally focused psychiatric consultation; EUC = enhanced usual care.
